# Supplementary material
Source: publisher site journal article supplement (https://www.dovepress.com/article/339230)
Supplement: Supplementary file 1 [file get_supplementary_file.php]

**Supplemental Materials**

**Supplemental Methods**

*ICD-10 codes for comorbid conditions*

Disease of circulatory system. The ICD-10 chapter IX covers a broad range of circulatory system related diseases. It contains the following sections:

- I00-I02: acute rheumatic fever
- I05-I09: chronic rheumatic heart diseases
- I10-I15: hypertensive diseases
- I20-I25: ischemic heart diseases
- I26-I28: pulmonary heart diseases and disease of pulmonary circulation
- I30-I52: other forms of heart disease
- I60-I69: cerebrovascular diseases
- I70-I79: diseases of arteries, arterioles, and capillaries
- I80-I89: diseases of veins, lymphatic vessels, and lymph nodes (if not classified elsewhere)
- I95-I99: other and unspecified disorders of the circulatory system

Mental and behavioral disorders. These disorders are included in chapter V of the ICD-10, including the following sections:

- F00-F09: organic (including symptomatic) mental disorders
- F10-F19: mental and behavioral disorders due to psychoactive substance use
- F20-F29: schizophrenia, schizotypal and delusional disorders
- F30-F39: mood (affective) disorders
- F40-F48: neurotic, stress-related and somatoform disorders
- F50-F59: behavioral syndromes associated with physiological disturbances and physical factors
- F60-F69: disorders of adult personality and behavior
- F70-F79: mental retardation
- F80-F89: disorders of psychological development
- F90-F98: behavioral and emotional disorders with onset usually occurring in childhood and adolescence
- F99: unspecified mental disorders

Diseases of the nervous system. The chapter VI of the ICD-10 is for diseases of the nervous system. It has the following sections:

- G00-G09: inflammatory diseases of the central nervous system
- G10-G14: systemic atrophies primarily affecting the central nervous system
- G20-G26: extrapyramidal and movement disorders
- G30-G32: other degenerative diseases of the nervous system
- G35-G37: demyelinating diseases of the central nervous system
- G40-G47: episodic and paroxysmal disorders
- G50-G59: nerve, nerve root and plexus disorders
- G60-G64: polyneuropathies and other disorders of the peripheral nervous system
- G70-G73: diseases of myoneural junction and muscle
- G80-G83: cerebral palsy and other paralytic syndromes
- G90-G99: other disorders of the nervous system

For each section mentioned above, there are subsections that document detailed disease diagnoses. For example, section I11 is for hypertensive heart disease. Down below it, there are subsections I11.0 which is for hypertensive heart disease with congestive heart failure and I11.9 which is for hypertensive heart disease without congestive heart failure. Section F30 is for manic episode, and it has five subsections: F30.0 for hypomania, F30.1 mania without psychotic symptoms, F30.2 mania with psychotic systems, F30.8 other manic episodes, and F30.9 manic episode (unspecified). We checked the ICD-10 records of each participant to examine whether the chapter codes appeared prior to the date entered the UK Biobank assessment. This strategy resulted in a dichotomized variable for the presence of each of the three broad comorbidity conditions.

*Other covariates*

In addition to the variables used in identifying matched uninfected people, we also considered other covariates including education, smoking behavior, and alcohol consumption in additional analyses. Education was college level (yes/no) depending on whether participants reported college/university degree or not (UK Biobank data field 6138-qualifications). For smoking behavior (yes/no), we considered whether participants had ever smoked before/was still smoking (yes) or had never smoked (no). This was constructed based on two UK Biobank data fields: 1249-past tobacco smoking and 1239-current tobacco smoking. If a participant answered “Smoked or most or all days” or “Smoked occasionally” in data field 1249 or answered “Yes, on most or all days” or “Only occasionally” in data field 1239, she/he was considered ever smoked. The smoking behavior was considered missing if a participant answered “Prefer not to answer” or did not provide an answer for both data fields. For alcohol consumption behavior (yes/no), we considered whether participants had ever drunk alcohol (yes) or had never (no). This was based on UK Biobank data field 20117-alcohol drinker status. A participant was considered ever drunk alcohol if she/he answered “Previous” or “Current” in this data field and was considered otherwise if she/he answered “Never”. The alcohol consumption behavior was considered missing if a participant answered “Prefer not to answer” or did not provide any answer in this data field.

**Supplemental Table 1.** Other covariates considered between PLWH and matched uninfected people

| **Variables** | | **Group** | | ***p* value** |
| --- | --- | --- | --- | --- |
| **PLWH**  **(*n* = 562)** | **Matched uninfected**  **(*n* = 562)** |  |
| Education |  |  |  | 0.004 |
|  | College | 228 (41.01%) | 179 (32.14%) |  |
|  | Not college | 328 (58.99%) | 378 (67.86%) |  |
| Smoking |  |  |  | 0.86 |
|  | Yes | 297 (52.85%) | 294 (52.31%) |  |
|  | No | 265 (47.15%) | 268 (47.69%) |  |
| Alcohol consumption | |  |  | 0.50 |
|  | Yes | 521 (92.71%) | 513 (91.61%) |  |
|  | No | 41 (7.30%) | 47 (8.39%) |  |

Values are expressed as number (%).

The Bowker’s test was used for comparisons of categorical variables.

**Supplemental Table 2.** Poor DSB burden (yes/no) and cognitive performance in PLWH and matched uninfected people

| Variable | Estimate (95% CI), *p* value | | |
| --- | --- | --- | --- |
|  | Hypothesis 1 | Hypothesis 2 | Hypothesis 3 |
| Intercept | 0.15 (-0.07, 0.37), 0.19 | 0.15 (-0.07, 0.37), 0.19 | 0.15 (-0.08, 0.38), 0.21 |
| Poor DSB burden (Yes) | -0.13 (-0.24, -0.03), 0.01 | -- | 0.002 (-0.14, 0.14), 0.98 |
| PLWH (Yes) | -- | -0.15 (-0.25, -0.05), 0.003 | 0.03 (-0.13, 0.19), 0.73 |
| Poor DSB burden (Yes) × PLWH (Yes) | -- | -- | -0.27 (-0.47, -0.07), 0.01 |
| Age | -0.02 (-0.03, -0.01), <0.0001 | -0.02 (-0.03, -0.01), <0.0001 | -0.02 (-0.03, -0.01), <0.0001 |
| Sex (Female) | 0.09 (-0.03, 0.21), 0.13 | 0.10 (-0.02, 0.21), 0.09 | 0.08 (-0.03, 0.20), 0.15 |
| Ethnicity (Not white) | -0.56 (-0.70, -0.43), <0.0001 | -0.58 (-0.72, -0.44), <0.0001 | -0.55 (-0.69, -0.42), <0.0001 |
| Townsend deprivation index | -0.03 (-0.04, -0.01), 0.001 | -0.03 (-0.04, -0.01), 0.0001 | -0.03 (-0.04, -0.01), 0.001 |
| Disease of circulatory system (Yes) | 0.02 (-0.11, 0.15), 0.76 | 0.02 (-0.11, 0.15), 0.80 | 0.02 (-0.12, 0.15), 0.82 |
| Mental and behavioral disorders (Yes) | -0.13 (-0.32, 0.06), 0.19 | -0.14 (-0.33, 0.05), 0.15 | -0.11 (-0.30, 0.08), 0.25 |
| Disease of nervous system (Yes) | -0.03 (-0.22, 0.16), 0.74 | -0.03 (-0.22, 0.16), 0.74 | -0.03 (-0.22, 0.15), 0.73 |
| Education (Not college) | -0.09 (-0.19, 0.02), 0.10 | -0.11 (-0.21, -0.003), 0.04 | -0.10 (-0.20, 0.004), 0.06 |
| Smoking (Yes) | 0.005 (-0.10, 0.11), 0.92 | 0.002 (-0.10, 0.11), 0.96 | 0.01 (-0.10, 0.11), 0.91 |
| Alcohol consumption (Yes) | 0.01 (-0.19, 0.21), 0.94 | 0.02 (-0.18, 0.22), 0.88 | 0.01 (-0.19, 0.21), 0.94 |

**Supplemental Table 3.** DSB burden score (2/1/0) and cognitive performance in PLWH and matched uninfected people

| Variable |  | Estimate (95% CI), *p* value | |
| --- | --- | --- | --- |
|  |  | Hypothesis 1 | Hypothesis 3 |
| Intercept |  | 0.16 (-0.07, 0.38), 0.17 | 0.15 (-0.08, 0.38), 0.20 |
| DSB burden score | |  |  |
|  | 1 | -0.07 (-0.19, 0.05), 0.23 | 0.04 (-0.12, 0.21), 0.59 |
|  | 2 | -0.21 (-0.33, -0.08), 0.001 | -0.06 (-0.23, 0.12), 0.53 |
| PLWH (Yes) |  | -- | 0.03 (-0.13, 0.19), 0.70 |
| DSB burden score × PLWH (Yes) | |  |  |
|  | 1 | -- | -0.25 (-0.48, -0.01), 0.04 |
|  | 2 | -- | -0.28 (-0.52, -0.04), 0.02 |
| Age |  | -0.02 (-0.03, -0.01), <0.0001 | -0.02 (-0.03, -0.01), <0.0001 |
| Sex (Female) |  | 0.09 (-0.03, 0.21), 0.13 | 0.08 (-0.03, 0.20), 0.15 |
| Ethnicity (Not white) | | -0.56 (-0.70, -0.42), <0.0001 | -0.55 (-0.69, -0.41), <0.0001 |
| Townsend deprivation index | | -0.02 (-0.04, -0.01), 0.001 | -0.02 (-0.04, -0.01), 0.001 |
| Disease of circulatory system (Yes) | | 0.03 (-0.10, 0.16), 0.67 | 0.02 (-0.11, 0.15), 0.72 |
| Mental and behavioral disorders (Yes) | | -0.12 (-0.31, 0.07), 0.23 | -0.10 (-0.29, 0.09), 0.29 |
| Disease of nervous system (Yes) | | -0.03 (-0.21, 0.16), 0.79 | -0.03 (-0.21, 0.16), 0.78 |
| Education (Not college) | | -0.08 (-0.18, 0.02), 0.13 | -0.09 (-0.19, 0.01), 0.08 |
| Smoking (Yes) | | 0.01 (-0.10, 0.11), 0.89 | 0.01 (-0.09, 0.11), 0.88 |
| Alcohol consumption (Yes) | | -0.01 (-0.21, 0.19), 0.95 | -0.01 (-0.21, 0.19), 0.96 |
